# Supplementary material for: PI3Kα inhibitor CYH33 triggers antitumor immunity in murine breast cancer by activating CD8+T cells and promoting fatty acid metabolism
Source: PubMed Central journal article supplement (PMC8354295; doi:10.1136/jitc-2021-003093), 2021-08-09
Supplement: jitc-2021-003093supp001.pdf [file jitc-2021-003093supp001.pdf]

**Supplemental Tables****Table S1. Fluorescently labeled antibodies for flow cytometry**

| <b>Name</b>                                        | <b>Clone</b>  | <b>Company</b> |
|----------------------------------------------------|---------------|----------------|
| APC-Cy7 Rat Anti-Mouse CD45                        | 30-F11        | BD Pharmingen  |
| FITC Hamster Anti-Mouse CD3e                       | 145-2C11      | BD Pharmingen  |
| BV605 Rat Anti-Mouse CD4                           | RM4-5         | BD Pharmingen  |
| PerCP-Cy <sup>TM</sup> 5.5 Rat Anti-Mouse CD8a     | 53-6.7        | BD Pharmingen  |
| BV650 Rat Anti-CD11b                               | M1/70         | BD Pharmingen  |
| APC Rat Anti-Mouse Ly-6G and Ly-6C                 | RB6-8C5       | BD Pharmingen  |
| PE-Cy7 Rat Anti-Mouse CD45R/B220                   | RA3-6B2       | BD Pharmingen  |
| BV421 Rat Anti-Mouse F4/80                         | T45-2342      | BD Pharmingen  |
| PE Hamster Anti-Mouse CD49b                        | HM $\alpha$ 2 | BD Pharmingen  |
| BV650 Rat Anti-Mouse CD45RA                        | 14.8          | BD Pharmingen  |
| PE-Cy7 Rat Anti-Mouse CD62L                        | MEL-14        | BD Pharmingen  |
| APC Rat Anti-Mouse CD44                            | IM7           | BD Pharmingen  |
| BV421 Hamster Anti-Mouse CD279 (PD-1)              | J43           | BD Pharmingen  |
| APC Rat Anti-Mouse IFN- $\gamma$                   | XMG1.2        | BD Pharmingen  |
| Granzyme B Monoclonal Antibody (NGZB), PE-Cyanine7 | NGZB          | eBioscience    |

---

|                                                   |          |               |
|---------------------------------------------------|----------|---------------|
| TNF alpha Monoclonal Antibody (MP6-<br>XT22), APC | MP6-XT22 | eBioscience   |
| PE Rat Anti-Mouse Foxp3                           | R16-715  | BD Pharmingen |
| BV421 Rat Anti-Mouse CD25                         | 3C7      | BD Horizon    |

---

**Table S2 Primers used for qPCR**

| <b>Gene name</b>                 | <b>Primer sequences</b>  |
|----------------------------------|--------------------------|
| <b>(Forward-F and Reverse-R)</b> |                          |
| miNOS-F                          | CGTTGGATTTGGAGCAGAAGTG   |
| miNOS-R                          | CATGCAAAATCTCTCCACTGCC   |
| mARG1-F                          | GGAATCTGCATGGGCAACCTGTGT |
| mARG1-R                          | AGGGTCTACGTCTCGCAAGCCA   |
| mCD206-F                         | TTGGACGGATAGATGGAGGG     |
| mCD206-R                         | CCAGGCAGTTGAGGAGGTTC     |
| mIL1 $\beta$ -F                  | GCAACTGTTCTGAACTCAACT    |
| mIL1 $\beta$ -R                  | ATCTTTTGGGGTCCGTCAACT    |
| mIL12-F                          | GACATCACACGGGACCAAAC     |
| mIL12-R                          | TACCAAGGCACAGGGTCATC     |
| mIL6-F                           | CACAAGTCCGGAGAGGAGAC     |
| mIL6-R                           | TTGCCATTGCACAACCTCTTT    |
| mIL10-F                          | AAGTGATGCCCCAGGCA        |
| mIL10-R                          | TCTCACCCAGGGAATTCAAA     |
| mCpt2-F                          | CAGCACAGCATCGTACCCA      |
| mCpt2-R                          | TCCCAATGCCGTTCTCAAAT     |
| mFatp2-F                         | TCGTGGGACTGGTAGATTTTG    |
| mFatp2-R                         | CGCGATGTGTTGAAAGAGTTT    |

---

|                    |                          |
|--------------------|--------------------------|
| mFasn-F            | GGAGGTGGTGATAGCCGGTAT    |
| mFasn-R            | TGGGTAATCCATAGAGCCCAG    |
| mPpara-F           | AACATCGAGTGTCGAATATGTGG  |
| mPpara-R           | CCGAATAGTTCGCCGAAAGAA    |
| mDgat2-F           | GCGCTACTTCCGAGACTACTT    |
| mDgat2-R           | GGGCCTTATGCCAGGAAACT     |
| mMgll-F            | CGGACTTCCAAGTTTTTGTTCAGA |
| mMgll-R            | GCAGCCACTAGGATGGAGATG    |
| m $\beta$ -Actin-F | TGTGATGGTGGGAATGGGTCAG   |
| m $\beta$ -Actin-R | TTTGATGTCACGCACGATTTCC   |
| mGapdh-F           | CATGTTCCAGTATGACTCCACTC  |
| mGapdh-R           | GGCCTCACCCCATTTGATGT     |

---
